# Supplementary material for: Differential expression of endogenous plant cell wall degrading enzyme genes in the stick insect (Phasmatodea) midgut
Source: PubMed Central journal article supplement (PMC4221708; doi:10.1186/1471-2164-15-917), 2014-10-21

# Top-Hit species distribution

## BLAST Top-Hits

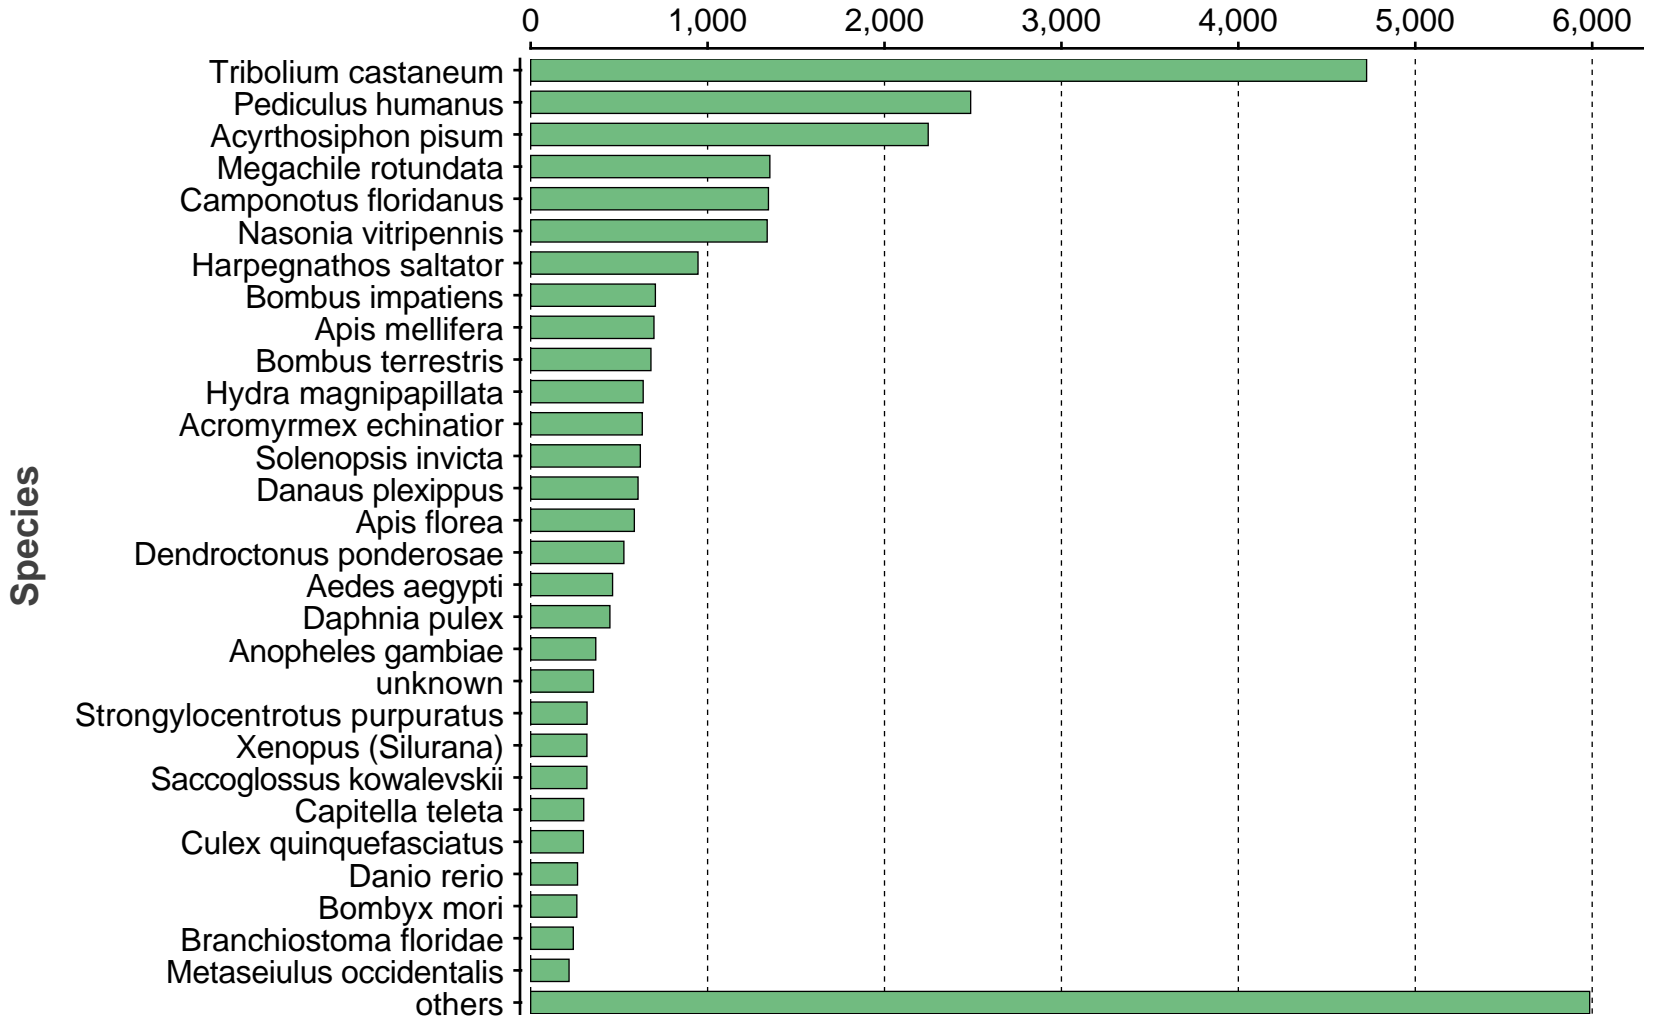

Supplement: 12864_2014_6620_MOESM10_ESM.pdf [file 12864_2014_6620_MOESM10_ESM.pdf]
